# Supplementary material for: Clinical and Economic Evaluation of Repository Corticotropin Injection: A Narrative Literature Review of Treatment Efficacy and Healthcare Resource Utilization for Seven Key Indications
Source: Springer Nature journal article supplement (doi:10.1007/s12325-017-0569-9), 2017-06-28
Supplement: MOESM1 [file 12488910]

Table S. FDA-approved indications for repository corticotropin injection

| Indication | Usage |
| --- | --- |
| Infantile spasms | Monotherapy for the treatment of infantile spasms in infants and children under 2 years of age |
| Multiple sclerosis | Treatment of acute exacerbations of multiple sclerosis in adults |
| Rheumatic disorders  Psoriatic arthritis  Rheumatoid arthritis (including juvenile rheumatoid arthritis)  Ankylosing spondylitis | As adjunctive therapy for short-term administration (to tide the patient over an acute episode or exacerbation). Selected cases may require low-dose maintenance therapy. |
| Collagen disease  Systemic lupus erythematosus  Systemic dermatomyositis (polymyositis) | During an exacerbation or as maintenance therapy in selected cases. |
| Dermatologic diseases  Severe erythema multiforme  Stevens-Johnson syndrome |  |
| Allergic states  Serum sickness |  |
| Ophthalmic diseases  Keratitis  Iritis  Iridocyclitis  Diffuse posterior uveitis and choroiditis  Optic neuritis  Chorioretinitis  Anterior segment inflammation | Severe acute and chronic allergic and inflammatory processes involving the eye and its adnexa |
| Respiratory diseases  Symptomatic sarcoidosis |  |
| Edematous states | To induce a diuresis or a remission of proteinuria in the nephrotic syndrome without uremia of the idiopathic type or that due to lupus erythematosus |
| Source: H.P. Acthar® Gel (repository corticotropin injection) prescribing information. Hampton, NJ: Mallinckrodt ARD, Inc.; 2015. | |
